# Supplementary material for: Orm family proteins mediate sphingolipid homeostasis
Source: Springer Nature journal article supplement (doi:10.1038/nature08787), 2010-02-01
Supplement: 41586_2010_BFnature08787_MOESM304_ESM.pdf [file 41586_2010_BFnature08787_MOESM304_ESM.pdf]

## SUPPLEMENTARY INFORMATION

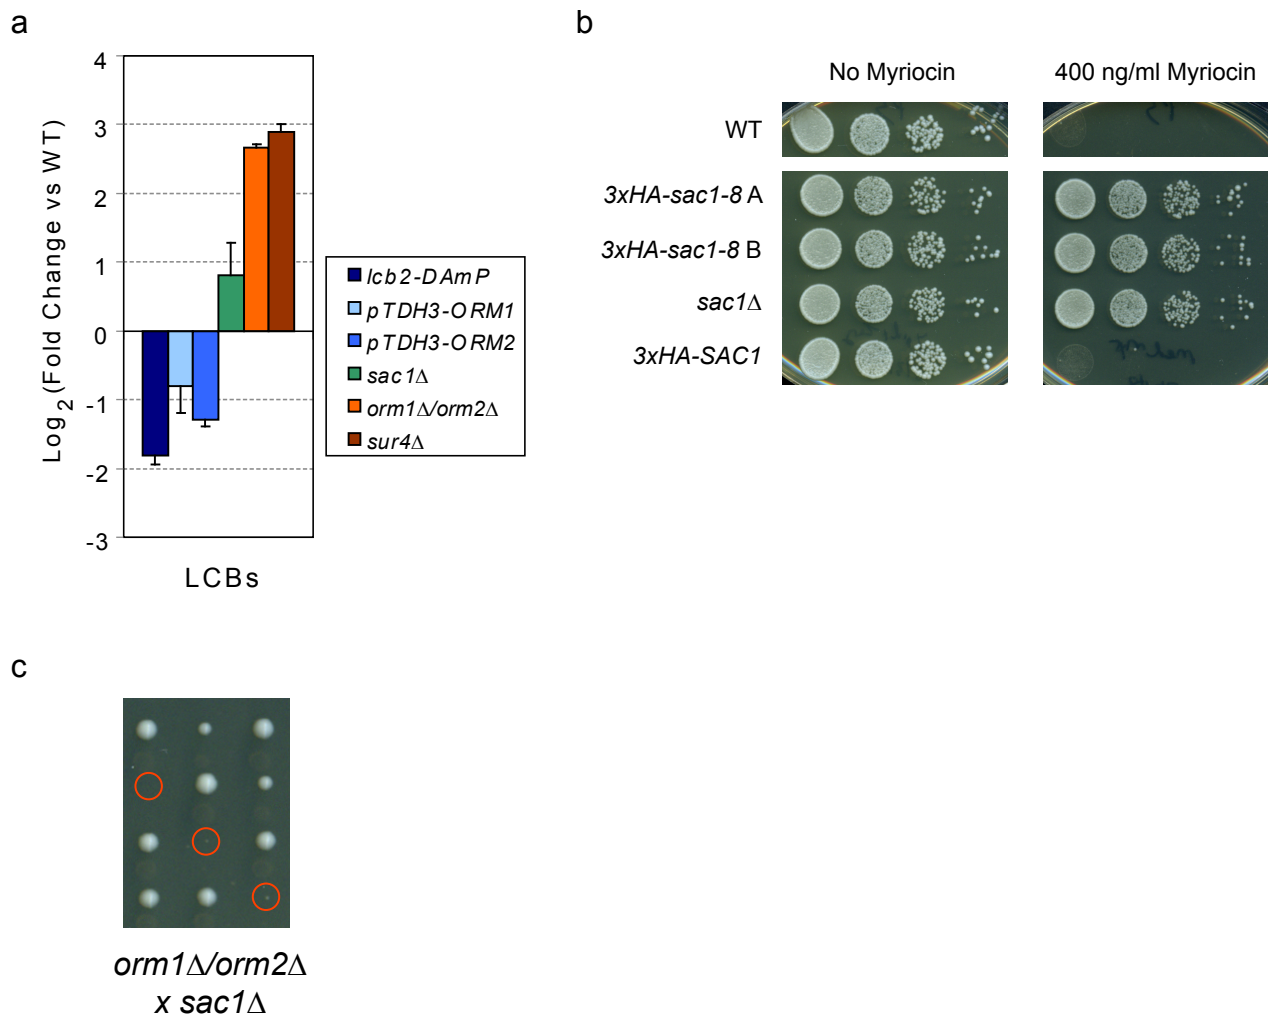**Supplementary Figure 1. A functional role for Sac1 in sphingolipid metabolism.**

**a**, Lipidomic analysis of LCB levels in the indicated strains are shown (average  $\pm$  s.d.,  $n = 3$ ).

**b**, Serial ten-fold dilutions of the indicated strains were spotted on plates with 0 or 400 ng/ml myriocin and imaged after 24–48 hr of growth. The *sac1-8* allele of *SAC1* is a catalytically inactive *SAC1* mutant described previously (ref. 1).

**c**, *ORM1/ORM2* and *SAC1* deletion mutants exhibit synthetic lethality. Representative tetrads from a *orm1Δ/orm2Δ x sac1Δ* cross are shown, with circles indicating spores with the *orm1Δ/orm2Δ/sac1Δ* genotype that fail to grow.

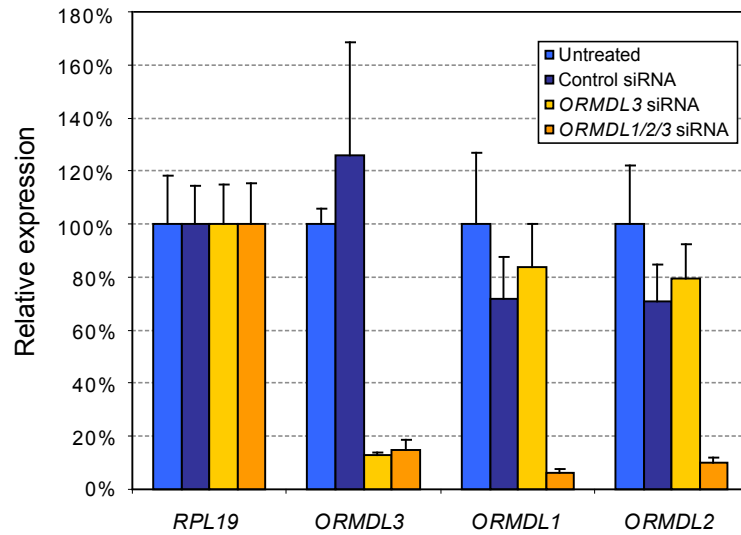

### Supplementary Figure 2. *ORMDL* gene expression after RNAi treatment

Gene expression was quantified for the indicated genes after transfection of HeLa cells with indicated siRNAs. RT-PCR was performed with primers for the indicated genes using *RPL19* as a reference. Data are normalized to expression levels in untreated cells (average  $\pm$  s.d.,  $n = 3$ ).

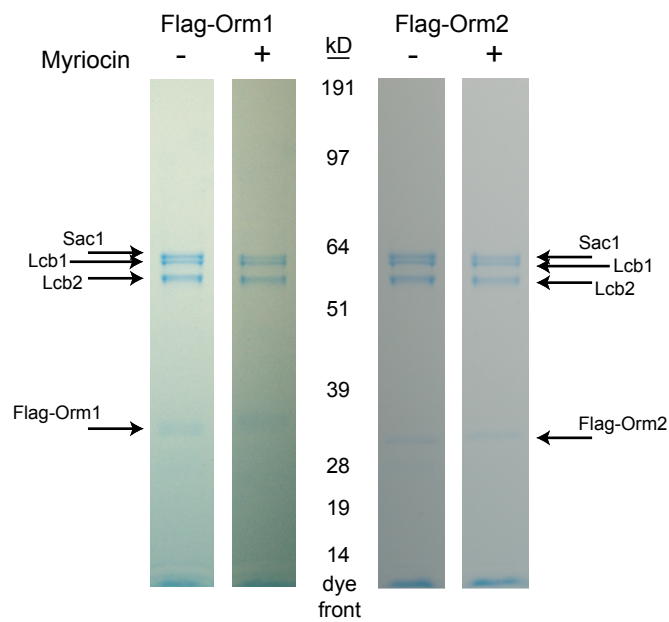

**Supplementary Figure 3. Myriocin treatment does not prevent formation of the Orm1/2-Lcb1/2-Sac1 complex.** Colloidal-stained SDS/PAGE gels are shown for native affinity purifications from strains expressing 3xFlag-Orm1 or 3xFlag-Orm2. Prior to harvest, the indicated strains were grown for 12-16 hr in standard rich media or media supplemented with 150 ng/ml myriocin.

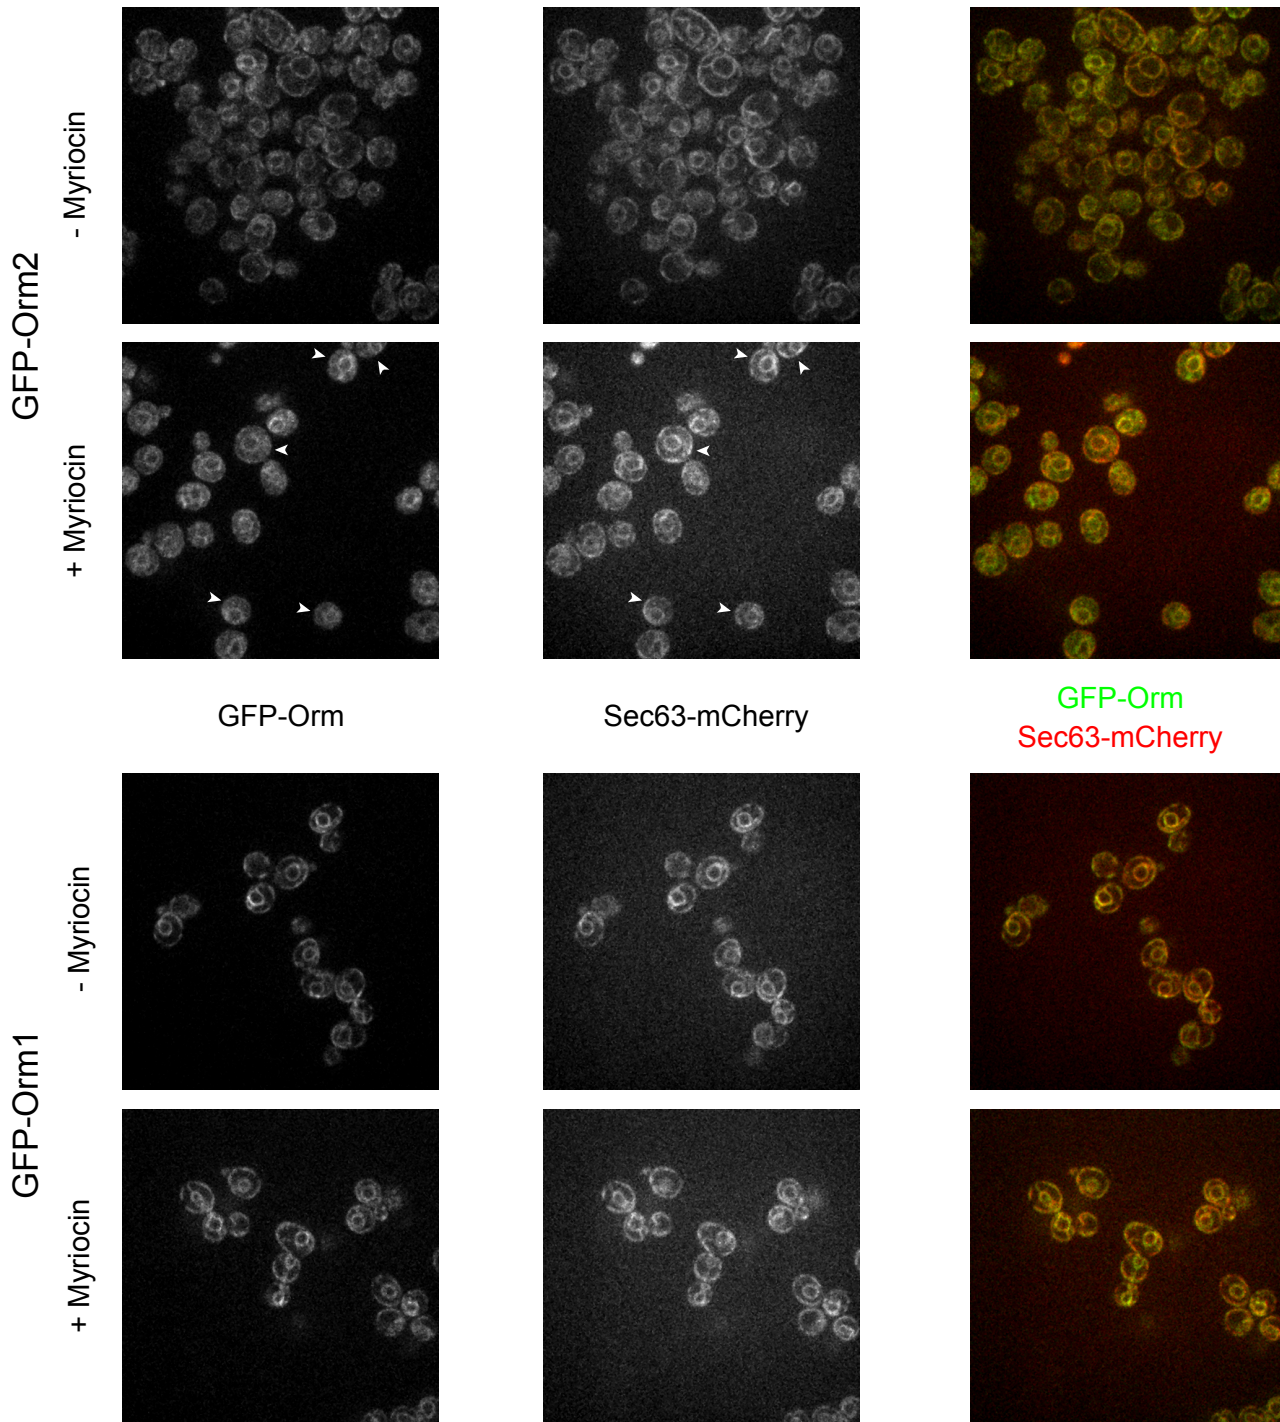

**Supplementary Figure 4. Orm2 localization changes in response to myriocin treatment.**

GFP-Orm2 and GFP-Orm1 were visualized in strains grown in rich media with or without myriocin. Sec63-mCherry was used as a marker for ER localization. Arrowheads in images of GFP-Orm2 indicate a reduction in cortical ER localization in response to myriocin treatment. Median filtering was applied to reduce image noise.

## Breslow et al. Supplementary Figure 5

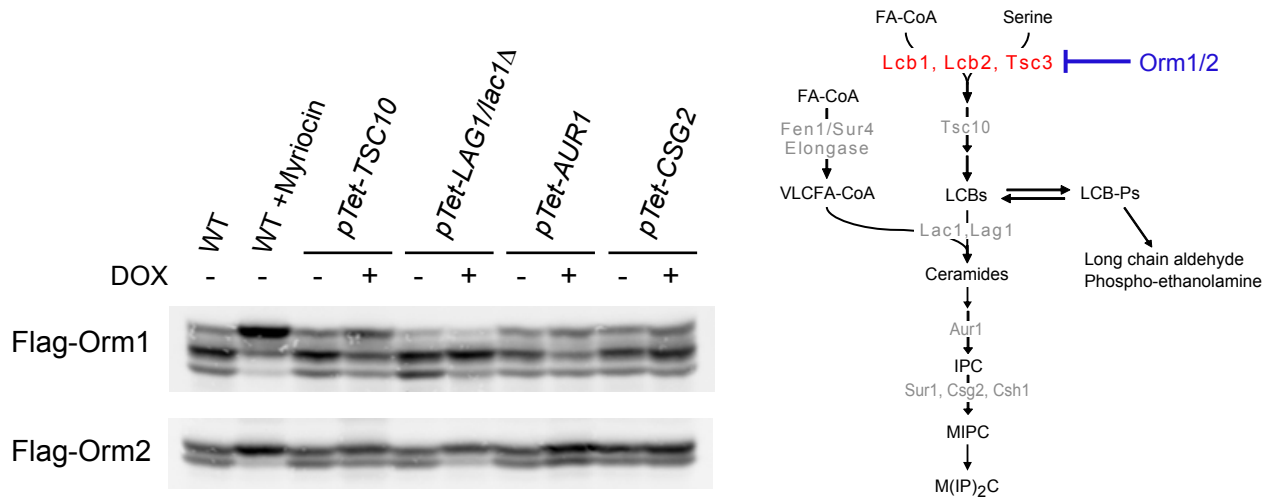

**Supplementary Figure 5. Disruptions to sphingolipid synthesis that act downstream of Lcb1/2 but upstream of Aur1 induce Orm1/2 phosphorylation.** Tetracycline-repressible promoters were inserted in front of the indicated genes in strains expressing 3xFlag-Orm1 or 3xFlag-Orm2 (note: *pTet-LAG1* was combined with deletion of *LAC1*). Lysates were prepared before and after gene expression shut-off (treatment with 5  $\mu$ g/ml doxycycline for 14-16 hr) and analyzed by Western blot against the Flag epitope after separation on phosphate-affinity SDS/PAGE gels. Note: gel-to-gel differences in banding pattern are due to variability in phosphate-affinity gel resolution.

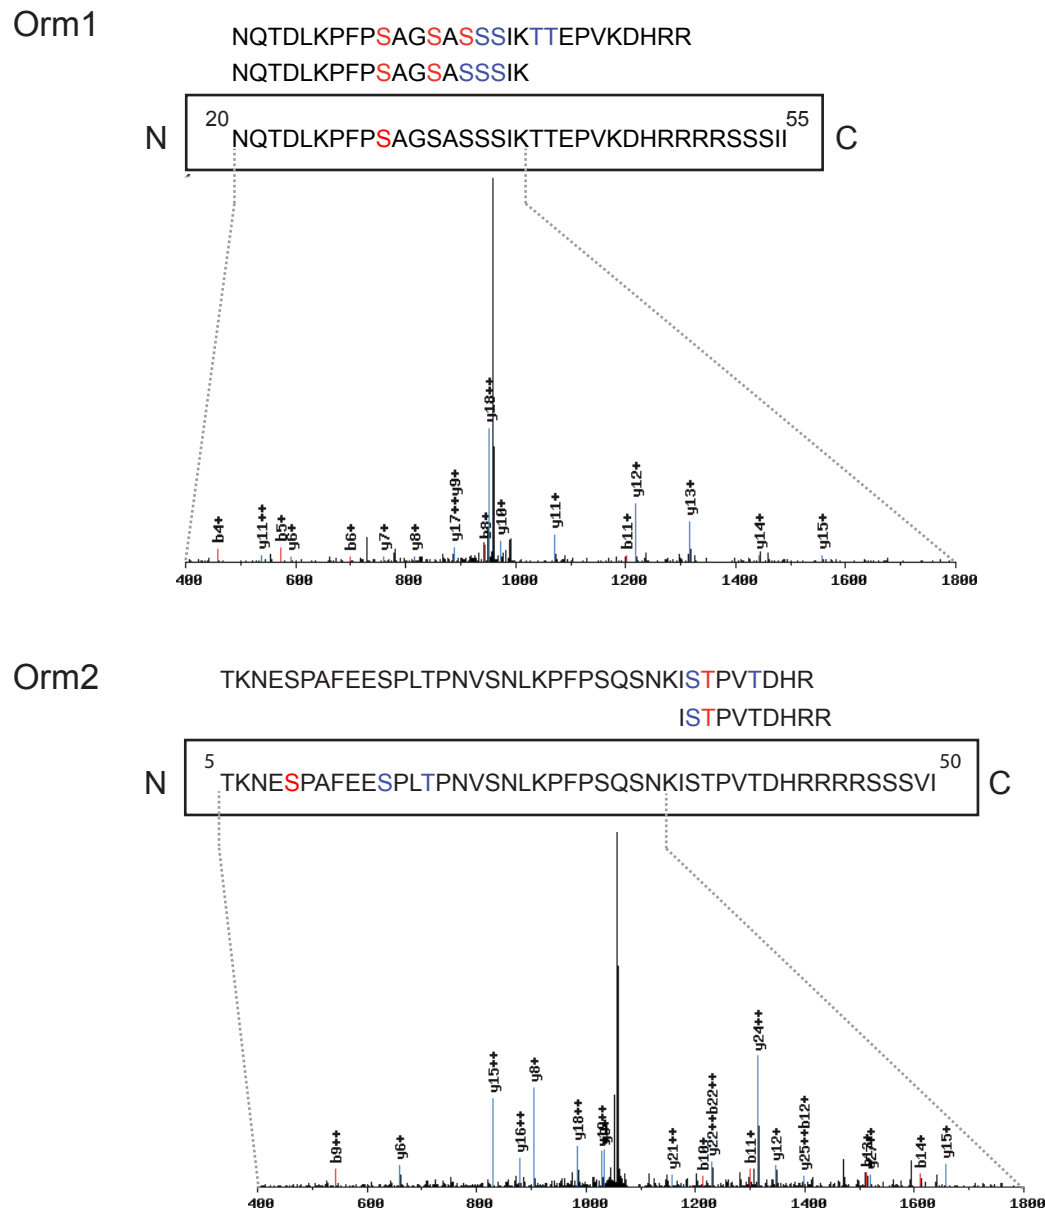

**Supplementary Figure 6. Mass spectrometry identifies phosphorylated residues on Orm1 and Orm2.** Phospho-peptides from immuno-precipitated 3xFlag-Orm1 and 3xFlag-Orm2 proteins were analyzed using an orbitrap mass spectrometer. For both Orm1 and Orm2, three phospho-peptides were identified. All Orm2 phospho-peptides were singly phosphorylated, whereas singly, doubly and triply phosphorylated peptides were identified for Orm1. The most probable phosphorylation site assignments are highlighted in red, and alternative assignments (with a lower probability) are highlighted in blue. For the boxed peptides NQTDLKPFP**S**\*AG**S**ASS**S**IK (Orm1) and TKNES**P**AF**E**ESPLTPN**V**SNLKPFP**S**QSN**K** (Orm2), annotated tandem mass spectra are shown, where *S*\* indicates the site of phosphorylation.

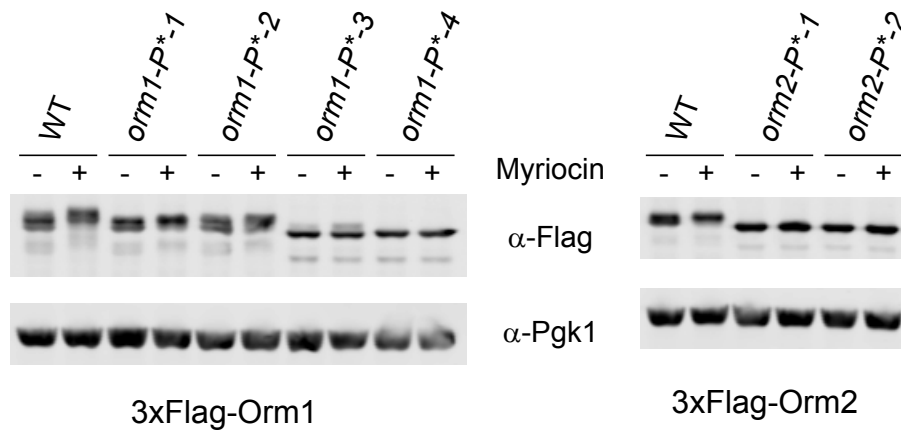

**Supplementary Figure 7. Wild type and phospho-mutant forms of Orm1 and Orm2 show similar expression levels.** Lysates from strains expressing 3xFlag-tagged wildtype (WT) or phospho-mutant alleles of *ORM1* and *ORM2* were prepared after growth for 12-16 hr in 0 or 150 ng/ml myriocin. Western blots of these lysates were probed against the Flag epitope and against Pgk1 as a loading control.

## Supplementary Methods

Plasmid sequences below are derived in part from published constructs described in Gari et al.<sup>2</sup> and Shaner et al.<sup>3</sup>

### pFA6a-NATMX4\_pTEF2\_eGFP\_Adh1-tm-AG

Primer annealing sequences used for PCR are underlined. TEF2 promoter sequence is in bold font.

GAACGCGGCCGCCAGCTGAAGCTTCGTACGCTGCAGGTCGACGGATCCCCGGGTTAATTAAGGCGGCCAGATCTGT  
 TTAGCTTGCCCTTGTCCTCCCGCCGGGTACCCGGCCAGCGACATGGAGGCCCAGAATACCCTCCTTGACAGTCTTGACG  
 TGCGCAGCTCAGGGGCATGATGTGACTGTGCCCCGTACATTTAGCCCATACATCCCCATGTATAATCATTTGCATCC  
 ATACATTTTGATGGCCGCACGGCGCAAGCAAAAATTACGGCTCCTCGCTGCAGACCTGCGAGCAGGGAAACGCTCC  
 CCTCACAGACGCGTTGAATTGTCCCCACGCCGCGCCCCCTGTAGAGAAATATAAAAAGGTTAGGATTTGCCACTGAGGT  
 TCTTCTTTTCATATACTTCCCTTTTAAAATCTTGCTAGGATACAGTTCTCACATCACATCCGAACATAAAACAACCATGG  
 GTACCACTCTTGACGACACGGCTTACCGGTACCGCACCAGTGTCCCAGGGGACGCCGAGGCCATCGAGGCACTGGAT  
 GGGTCCCTTACCACCGACACCGTCTTCCGCGTCACCGCCACCGGGGACGGCTTACCCTGCGGGAGGTGCCGGTGGAA  
 CCCGCCCCGTGACCAAGGTGTTCCCCGACGACGAATCGGACGACGAATCGGACGACGGGGAGGACGGCGACCCGGACT  
 CCCGGACGTTTCGTGCGGTACGGGGACGACGGCGACCTGGCGGGCTTCGTGGTTCGTCTCGTACTCCGGCTGGAACCGC  
 CGCTGACCGTCGAGGACATCGAGGTGCCCCGGAGCACCGGGGACCGGGGTCGGGCGCGGTTGATGGGGCTCGC  
 GACGGAGTTGCCCCGCGAGCGGGGCGCCGGGCACCTCTGGCTGGAGGTCACCAACGTCAACGCACCGGCGATCCACG  
 CGTACCGGCGGATGGGGTTACCCTCTGCGGCCTGGACACCGCCCTGTACGACGGCACCGCCTCGGACGGCGAGCAG  
 GCGCTCTACATGAGCATGCCCTGCCCTAATCAGTACTGACAATAAAAAGATTCTTGTGTTTTCAAGAACTTGTCAATTT  
 GTATAGTTTTTTTTATATTGTAGTTGTTCTATTTTTAATCAAATGTTAGCGTGATTTATATTTTTTTTTTCGCCTCGACAT  
 CATCTGCCCAGATGCGAAGTTAAGTGCGCAGAAAGTAATATCATGCGTCAATCGTATGTGAATGCTGGTTCGCTATAC  
 TGCTGTGATTTCGATACTAACGCCGCCATCCAGTGTGAAAACGAGCTC**ATATATGGGGCCGTATACTTACATATAG**  
**TAGATGTCAAGCGTAGGCGCTTCCCCTGCCGGCTGTGAGGGCGCCATAACCAAGGTATCTATAGACCGCCAATCAGC**  
**AACTACCTCCGTACATTCATGTTGCACCCACACATTTATACACCCAGACCGGACAAATTACCATAAGGTTGTTT**  
**GTGACGGCGTCGTACAAGAGAACGTGGGAACTTTTTAGGCTCACAAAAAAGAAAGAAAAAATACGAGTTGCTGACA**  
**GAAGCCTCAAGAAAAAAAATTCTTCTTCGACTATGCTGGAGGCAGAGATGATCGAGCCGGTAGTTAACTATATAT**  
**AGCTAAATTGGTTCCATCACCTTCTTTCTGGTGTGCTCCTTCTAGTGCTATTTCTGGCTTTTTCTATTTTTTTTT**  
**TTCCATTTTTCTTCTCTTTTTCTAATATATAAATTCTCTTGCATTTTTCTATTTTTCTCTCTATCTATTCTACTTGT**  
**TTATTCCCTTCAAGGTTTTTTTTTAAGGAGTACTTGTTTTTTAGAATATACGGTCAACGAACTATAATTAACTAAACA**  
**CTAGTACCATGAGTAAAGGAGAAGAACTTTTCACTGGAGTTGTCCCAATTCTTGTGTAATTAGATGGTGATGTTAAT**  
 GGGCACAAATTTTCTGTGAGTGGAGAGGGTGAAGGTGATGCAACATACGGAAAACCTACCCTTAAATTTATTTGCAC  
 TACTGGAAAACCTACCTGTTCCATGGCCAACACTTGTCACTACTTTCACTTATGGTGTTCATGCTTTTCAAGATACC  
 CAGATCATATGAAACGGCATGACTTTTTCAAGAGTGCCATGCCCGAAGGTTATGTACAGGAAAGAACTATATTTTTTC  
 AAAGATGACGGGAACATAAGACACGTGCTGAAGTCAAGTTTGAAGGTGATACCCTTGTTAATAGAATCGAGTTAAA  
 AGGTATTGATTTTTAAAGAAGATGGAACATTCTTGGACACAAATTGGAATACAACATAAATACTCACACAATGTATACA  
 TCATGGCAGACAAAACAAAAGAATGGAATCAAAGTTAACTTCAAATTAGACACAACATTGAAGATGGAAGCGTTCAA  
 CTAGCAGACCATTATCAACAAAATACTCCAATTGGCGATGGCCCTGTCTTTTTACCAGACAACCATTACCTGTCCAC  
 ACAATCTGCCCTTTCGAAAGATCCCAACGAAAAGAGAGACCACATGGTCTTCTTGAGTTTGTAAACAGCTGCTGGGA  
 TTACACATGGCATGGATGAACTATACAAATAGGGCCTCGAGgccccgctattaacgcttttgtaatgtatagcttttaa  
 tgtgtgatcgccctgacttttgcacgcgcgcccggcgccgagcgcgctgctccaggcagcgtcacggcgccaggtggcg  
 gctgtgagagctggcgcgactggcgcgactgtcgctgtcaegtgaaggcgaccacgggtggagaaaatttttggcca  
 acggcgcgagagcagtcctcgacAACGAGCTCGAATTCATCGACCGCGGATCTGCCGGTCTCCCTATAGTGAGTCG  
 TATTAATTTTCGATAAGCCAGGTTAACCTGCATTAATGAATCGGCCAACGCGGGGAGAGGCGGTTTTCGCTATTGGG  
 CGCTCTTCCGCTTCCCTCGCTCACTGACTCGCTGCGCTCGGTGCTTTCGGCTGCGGGCAGCGGTATCAGCTCACTCAA  
 GGCGGTAATACGGTTATCCACAGAATCAGGGGATAACGCAGGAAAGAACATGTGAGCAAAAGGCCAGCAAAAGGCCA  
 GGAACCGTAAAAAGGCCGCGTTGCTGGCGTTTTTTCATAGGCTCCGCCCCCTGACGAGCATCAAAAAATCGACGC



TCAAGTCAGAGGTGGCGAAACCCGACAGGACTATAAAGATAACCAGGCGTTTCCCCCTGGAAGCTCCCTCGTGCGCTC  
 TCCTGTTCCGACCCTGCCGCTTACCGGATACCTGTCCGCTTTCTCCCTTCGGAAGCGTGGCGCTTTCTCAATGCT  
 CACGCTGTAGGTATCTCAGTTCGGTGTAGGTGCTTCCGCTCCAAGCTGGGCTGTGTGCACGAACCCCCCGTTTCAGCCC  
 GACCGCTGCGCCTTATCCGGTAACTATCGTCTTGAGTCCAACCCGGTAAAGACACGACTTATCGCCACTGGCAGCAGC  
 CACTGGTAAACAGGATTAGCAGAGCGAGGTATGTAGGCGGTGCTACAGAGTTCTTGAAGTGGTGGCCTAACTACGGCT  
 AACTAGAAGGACAGTATTTGGTATCTGCGCTCTGCTGAAGCCAGTTACCTTCGGAAAAAGAGTTGGTAGCTCTTGA  
 TCCGGCAAACAAACCACCGCTGGTAGCGGTGGTTTTTTTTGTTTGCAAGCAGCAGATTACGCGCAGAAAAAAGGATC  
 TCAAGAAGATCCTTTGATCTTTTCTACGGGGTCTGACGCTCAGTGGAACGAAAACCTCACGTTAAGGGATTTTGGTCA  
 TGAGATTATCAAAAAGGATCTTACCTAGATCCTTTTAAATTAATAAATGAAGTTTTAAATCAATCTAAAGTATATAT  
 GAGTAAACTTGGTCTGACAGTTACCAATGCTTAATCAGTGAGGCACCTATCTCAGCGATCTGTCTATTTTCGTTTCATC  
 CATAGTTGCCTGACTCCCCGCTGGTGTAGATAACTACGATACGGGAGGGCTTACCATCTGGCCCCAGTGTGCAATGA  
 TACCGCGAGACCCACGCTCACCGGCTCCAGATTTATCAGCAATAAACAGCCAGCCGGAAGGGCCGAGCGCAGAAGT  
 GGTCTGCAACTTTATCCGCCTCCATCCAGTCTATTAATTGTTGCCGGGAAGCTAGAGTAAGTAGTTCCGCAGTTAA  
 TAGTTTTGCGCAACGTTGTTGCCATTGCTACAGGCATCGTGGTGTACGCTCGTCTGTTTGGTATGGCTTCATTACGCT  
 CCGGTTCCCAACGATCAAGGCGAGTTACATGATCCCCCATGTTGTGCAAAAAAGCGGTTAGCTCCTTCGGTCTCCG  
 ATCGTTGTGAGAAGTAAGTTGGCCGAGTGTATCACTCATGGTTATGGCAGCACTGCATAATTCTCTTACTGTCTAT  
 GCCATCCGTAAGATGCTTTTTCTGTGACTGGTGTACTCAACCAAGTCATTCTGAGAATAGTGTATGCGGCGACCGA  
 GTTGCTCTTGCCCGGCTCAATACGGGATAATACCGCGCCACATAGCAGAACTTTAAAAGTGCTCATCATTGGAAAA  
 CGTTCTTCGGGGCGAAAACCTCAAGGATCTTACCGCTGTTGAGATCCAGTTCGATGTAACCCACTCGTGCACCCAA  
 CTGATCTTCAGCATCTTTTACTTTTACCAGCGTTTCTGGGTGAGCAAAAACAGGAAGGCAAAATGCCGCAAAAAAGG  
 GAATAAGGGCGACACGGAAATGTTGAATACTCATACTCTTCTTTTTCAATATTATTGAAGCATTATCAGGGTTAT  
 TGTCTCATGAGCGGATACATATTTGAATGTATTTAGAAAAATAAACAAATAGGGGTTCCGCGCACATTTCCCCGAAA  
 AGTGCCACCTGACGCTAAGAAACCATTATTATCATGACATTAACCTATAAAAATAGGCGTATCACGAGGCCCTTTC  
 GTCTCGCGCGTTTCGGTGATGACGGTGAAAACCTCTGACACATGCAGCTCCCGGAGACGGTACAGCTTGTCTGTAA  
 GCGGATGCCGGGAGCAGACAAGCCCGTCAGGGCGCGTCAGCGGGTGTGGCGGGTGTGGGGGCTGGCTTAACTATGC  
 GGCATCAGAGCAGATTGTAAGTGCACCATATGGACATATTGTCTGTTAGAACGGGCTACAATTAATACATAA  
 CCTTATGTATCATACACATACGATTTAGGTGACACTATA

### pFA6a-NATMX4\_pTDH3\_eGFP\_Adh1-tm-AG

Primer annealing sequences used for PCR are underlined. TDH3 promoter sequence is in bold font.

GAACGCGGCCGCCAGCTGAAGCTTCGTACGCTGCAGGTCGACGGATCCCCGGGTTAATTAAGGCGCGCCAGATCTGT  
 TTAGCTTGCCCTTGTCCTCCCGCCGGGTACCCGGCCAGCGACATGGAGGCCAGAAATACCCTCCTTGACAGTCTTGACG  
 TGCGCAGCTCAGGGGCATGATGTGACTGTGCGCCGTACATTTAGCCCATACATCCCCATGTATAATCAGTTGCATCC  
 ATACATTTTGTATGGCCGACGGCGCGAAGCAAAAATTACGGCTCCTCGCTGCAGACCTGCAGCAGGAAACCGCTCC  
 TCTCACAGCAGCGTTGAATTTGCTCCACGCGCCGCCCCGTGTAGAGAAATATAAAAAGGTTAGGATTTGCCACTGAGGT  
 TCTTCTTTTATATACTTCTTTTTAAATCTTGCTAGGATACAGTTCTCACATCACATCCGAACATAAAACAACCATGG  
 GTACCCTCTTGACGACACGGCTTACCGGTACCGCACAGTGTCCCGGGGACGCCGAGGCCATCGAGGCACTGGAT  
 GGGTCTTACCACCGACACCGTCTTCCGCGTACCGCCACCGGGGACGGCTTACCCTGCGGGAGGTGCCGGTGGAA  
 CCCGCCCTGACCAAGGTGTTCCCGACGACGAATCGGACGACGAATCGGACGACGGGAGGACGGCGACCCGGACT  
 CCCGGACGTTTCGTGCGGTACGGGACGACGGCGACCTGGCGGGCTTCGTGGTCTGCTACTCCGGCTGGAACCGC  
 CGGCTGACCGTTCGAGGACATCGAGGTGCGCCCGGAGCACCGGGGGCACGGGTGCGGCGCGCTTGATGGGGCTCGC  
 GACGGAGTTGCCCCGCGAGCGGGGCGCCGGGCACCTCTGGCTGGAGGTCACCAACGTCAACGCACCGGCGATCCACG  
 CGTACCGGCGGATGGGGTTACCCTCTGCGGCCTGGACACCGCCCTGTACGACGGCACCGCCTCGGACGGCGAGCAG  
 GCGCTCTACATGAGCATGCCCTGCCCTAATCAGTACTGACAATAAAAAGATTCTTGTTTTTCAAGAATTGTCAATTT  
 GTATAGTTTTTTTTATATTGTAGTTGTTCTATTTTAAATCAAATGTTAGCGTGATTTATATTTTTTTTCGCTCGACAT  
 CATCTGCCAGATGCGAAGTTAAGTGCAGAAAGTAATATCATGCGTCAATCGTATGTGAATGCTGGTTCGCTATAC  
 TGCTGTGATTCGATACTAACGCCGCCATCCAGTGTGCAAAACGAGCTC**CACGCTTTTTTTCAGTTCGAGTTTATCATT**  
**ATCAATACTGCCATTTCAAAGAATACGTAATAATTAATAGTAGTGATTTTCTTAACCTTTATTTAGTCAAAAAATTA**  
**GCCTTTTAAATCTGCTGTAACCCGTACATGCCAAAAATAGGGGGCGGGTTACACAGAATATATAACATCGTAGGTGT**  
**CTGGGTGAACAGTTTATCTGCGCATCCACTAAATATAATGGAGCCCGCTTTTTAAGCTGGCATCCAGAAAAAATAA**  
**GAATCCAGCACCAAAATATTGTTTTCTTACCAACCATCAGTTCATAGGTCCATTCTCTTAGCGCAACTACAGAGA**

**ACAGGGGCACAAACAGGCCAAAAACGGGCACAACCTCAATGGAGTGATGCAACCTGCCTGGAGTAAATGATGACACA**  
**AGGCAATTGACCCACGCATGTATCTATCTCATTCTTTTACACCTTCTATTACCTTCTGCTCTCTCTGATTTGGAAAA**  
**AGCTGAAAAAAAAGGTTGAAACCAGTTCCCTGAAATTATTCCCCTACTTGACTAATAAGTATATAAAGACGGTAGGT**  
**ATTGATTGTAATTCTGTAAATCTATTTCTTAAACTTCTTAAATTCTACTTTTATAGTTAGTCTTTTTTTTTAGTTTTA**  
**AAACACCAAGAACTTAGTTTTCGAATAAACACACATAAACAAAC**ACTAGTACCATGAGTAAAGGAGAAGAACTTTTTCA  
 CTGGAGTTGTCCCAATTCTTGTGTAATTAGATGGTGATGTTAATGGGCACAAATTTTCTGTCACTGGAGAGGGTGAA  
 GGTGATGCAACATACGGAAAACCTTACCCTTAAATTTATTTGCACTACTGGAAAACCTACCTGTTCCATGGCCAACACT  
 TGTCACTACTTTCACTTATGGTGTTCAATGCTTTTCAAGATACCCAGATCATATGAAACGGCATGACTTTTTCAAGA  
 GTGCCATGCCCCGAAGGTTATGTACAGGAAAGAACTATATTTTTCAAAGATGACGGGAACTACAAGACACGTGCTGAA  
 GTCAAGTTTGAAGTGATACCCTTGTTAATAGAATCGAGTTAAAAGGTATTGATTTTTAAAGAAGATGGAACATTTCT  
 TGGACACAAATTGGAATACAACATAAECTCACACAATGTATACATCATGGCAGACAAAAGAAATGGAATCAAAG  
 TTAACTTCAAATTAGACACAACATTGAAGATGGAAGCGTTCAACTAGCAGACCATTATCAACAAAATACTCCAATT  
 GGCGATGGCCCTGTCCTTTTACCAGACAACCATTACCTGTCCACACAATCTGCCCTTTGAAAGATCCCAACGAAAA  
 GAGAGACCACATGGTCCTTCTTGAGTTTGTAAACAGCTGCTGGGATTACACATGGCATGGATGAACTATACAAATAGG  
**GCCTCGAG**gccccgctattaacgctttgtaatgtatagcttttaaatgtgtgatcgctgacttttgcacgcgcccgg  
 cggcagecgcgctgctccagcagcgtcacggcgcaggtggcgggctgtgcgagctgcccgcgactggcgcgactgtc  
 gctgtcacgtgacggcgaccacgggtggagaaaatTTTTGGCCAACGGCgcgagagcagtcctcgacAACGAGCTC  
 GAATTCATCGACCGGGATCTGCCGCTCCTTATAGTGAGTCGTATTAATTTGATAAGCCAGGTTAACCTGCATT  
 AATGAATCGGCCAACCGCGGGGAGAGGCGGTTTTGCGTATTGGGCGCTCTTCCGCTTCCCTCGCTCACTGACTCGCTG  
 CGCTCGGTCGTTCCGCTGCGGCGAGCGGTATCAGCTCACTCAAAGGCGGTAATACGGTTATCCACAGAATCAGGGGA  
 TAACGCAGGAAAGAACATGTGAGCAAAAGGCCAGCAAAAGGCCAGGAACCGTAAAAAGGCCGCGTTGCTGGCGTTTT  
 TCCATAGGCTCCGCCCCCTGACGAGCATCACAAAATCGACGCTCAAGTCAGAGGTGGCGAAACCCGACAGGACTA  
 TAAAGATACCAGGCGTTTTCCCCCTGGAAGCTCCCTCGTGCGCTCTCCTGTTCCGACCCTGCCGCTTACCGGATACCT  
 GTCCGCCTTTCTCCCTTCGGGAAGCGTGCGCTTTCTCAATGCTCACGCTGTAGGTATCTCAGTTCGGTGTAGGTGCG  
 TTCGCTCCAAGCTGGGCTGTGTGCACGAACCCCCCGTTCAGCCCCAGCGCTGCGCCTTATCCGGTAACTATCGTCTT  
 GAGTCCAACCCGGTAAGACACGACTTATCGCCACTGGCAGCAGCCACTGGTAACAGGATTAGCAGAGCGAGGTATGT  
 AGGCGGTGCTACAGAGTTCTTGAAGTGGTGGCCTAACTACGGCTACACTAGAAGGACAGTATTTGGTATCTGCGCTC  
 TGCTGAAGCCAGTTACCTTCGGAAAAAGAGTTGGTAGCTTGTATCCGGCAAACAACCACCGCTGGTAGCGGTGGT  
 TTTTTTGTGCAAGCAGCAGATTACGCGCAGAAAAAAGGATCTCAAGAAGATCCTTTGATCTTTTCTACGGGGTTC  
 TGACGCTCAGTGAACGAAAACCTCACGTTAAGGGATTTTGGTCATGAGATTATCAAAAAGGATCTTACCTAGATCC  
 TTTTAAATTAATAAATGAAGTTTTAAATCAATCTAAAGTATATATGAGTAAACTTGGTCTGACAGTTACCAATGCTTA  
 ATCAGTGAGGCACCTATCTCAGCGATCTGTCTATTTTCGTTTCATCCATAGTTGCCTGACTCCCCGTCGTGTAGATAAC  
 TACGATACGGGAGGGCTTACCATCTGGCCCCAGTGCTGCAATGATACCGCGAGACCCACGCTCACCGGCTCCAGATT  
 TATCAGCAATAAACCAGCCAGCCGGAAGGGCCGAGCGCAGAAGTGGTCCTGCAACTTTATCCGCCTCCATCCAGTCT  
 ATTAATTGTTGCCGGGAAGCTAGAGTAAGTAGTTTCGCCAGTTAATAGTTTTCGCAACGTTGTTGCCATTGCTACAGG  
 CATCGTGGTGTACGCTCGTCTGTTTGGTATGGCTTCATTACGCTCCGGTTCACACGATCAAGGCGAGTTACATGAT  
 CCCCCATGTTGTGCAAAAAGCGGTTAGCTCCTTCGGTCTCCGATCGTTGTCAGAAGTAAGTTGGCCGAGTGTTA  
 TCACTCATGGTTATGGCAGCACTGCATAATTCTTACTGTATGCCATCCGTAAGATGCTTTTTCTGTGACTGGTGA  
 GTACTCAACCAAGTCATTCTGAGAATAGTGTATGCGGCGACCGAGTTGCTCTTGCCCGGCGTCAATACGGGATAATA  
 CCGCGCCACATAGCAGAACTTTAAAAGTGCTCATATTGGAACGTTCTTCCGGGGCGAAAACCTCTCAAGGATCTTA  
 CCGCTGTTGAGATCCAGTTTCGATGTAACCCACTCGTGCACCCAACCTGATCTTCAGCATCTTTTACTTTTACCAGCGT  
 TTCTGGGTGAGCAAAAACAGGAAGGCAAAATGCCGCAAAAAGGGGAATAAGGGCGACACGGAAATGTTGAATACTCA  
 TACTCTTCTTTTCAATATTATTGAAGCATTATCAGGGTTATTGTCTCATGAGCGGATACATATTTGAATGTATT  
 TAGAAAAATAACAAATAGGGGTTCCGCGCACATTTCCCCGAAAAGTGCCACCTGACGCTAAGAAACCATTATTAT  
 CATGACATTAACCTATAAAAATAGGCGTATCACGAGGCCCTTTCGTCTCGCGCGTTTCCGGTATGACGGTGAAAACC  
 TCTGACACATGCAGCTCCCGGAGACGGTCACAGCTTGTCTGTAAGCGGATGCCGGGAGCAGACAAGCCCGTCAGGGC  
 CGCTCAGCGGGTGTGGCGGGTGTCCGGGCTGGCTTAACTATGCGGCATCAGAGCAGATTGTACTGAGAGTGACCA  
 TATGGACATATTGTCGTTAGAACCGCGCTACAATTAATACATAACCTTATGTATCATAACACATAACGATTTAGGTGAC  
 ACTATA

### pFA6a-NAT-MX4-Tet-Act-pTet

A fusion PCR product of the pFA6a-NATMX4 marker, Tet-Activator, and 4XTet-Operator promoter was generated and cloned into the pCR2.1-TOPO vector

(Invitrogen). The sequence of the cloned PCR product is given below (NAT marker is underlined, TetO sites are in bold font):

GGTCGACGGATCCCCGGGTTAATTAAGGCGCGCCAGATCTGTTTAGCTTGCCCTCGTCCCCGCCGGGTACCCGGCCA  
 GCGACATGGAGGCCAGAAATACCCTCCTTGACAGTCTTGACGTGCGCAGCTCAGGGGCATGATGTGACTGTGCCCCG  
 TACATTTAGCCCATACATCCCATGTATAATCATTTGCATCCATACATTTTGATGGCCGCACGGCGGAAGCAAAAA  
 TTACGGCTCCTCGCTGCAGACCTGCGAGCAGGGAAACGCTCCCCTCACAGACGCGTTGAATTGTCCCCACGCCGCGC  
 CCCTGTAGAGAAATATAAAAGGTTAGGATTTGCCACTGAGGTTCTTCTTTTCATATACTTCCCTTTTAAAATCTTGCTA  
 GGATACAGTTCTCACATCACATCCGAACATAAAACAACCATGGGTACCCTCTTGACGACACGGCTTACCGGTACCGC  
 ACCAGTGTCCCCGGGGGACGCCGAGGCCATCGAGGCACTGGATGGGTCCCTTACCACCGACACCGTCTTCCGCGTAC  
 CGCCACCGGGGACGGCTTACCCTGCGGGAGGTGCCGGTGGACCCGCCCTGACCAAGGTGTTCCCCGACGACGAAT  
 CGGACGACGAATCGGACGACGGGGAGGACGGCGACCCGGACTCCCGGACGTTCTGTCGCGTACGGGGACGACGGCGAC  
 CTGGCGGGCTTCGTGGTCTGCTACTCCGGCTGGAACCGCCGGCTGACCGTTCGAGGACATCGAGGTCGCCCGGA  
 GCACCGGGGGCACGGGGTTCGGGGCGCGGTTGATGGGGCTCGCGACGGAGTTTCGCCCGGAGCGGGGGCGCCGGGCACC  
 TCTGGCTGGAGGTACCAACGTCAACGCACCGGCGATCCACGCGTACCGGCGGATGGGGTTCACCCTCTGCGGCCTG  
 GACACCGCCCTGTACGACGGCACCGCCTCGGACGGCGAGCAGGCGCTCTACATGAGCATGCCCTGCCCTAATCAGT  
 ACTGACAATAAAAAGATTCTTGTGTTTTCAAGAACTTGTCAATTTGTATAGTTTTTTTTTATATTGTAGTTGTTCTATTTTA  
 ATCAAATGTTAGCGTGATTTATATTTTTTTTTTCGCCTCGACATCATCTGCCAGATGCGAAGTTAAGTGCAGAAAG  
 TAATATCATGCGTCAATCGTATGTGAATGCTGGTTCGCTATACTGCTGTGATTTCGATACTAACGCCGCCATCCAGTG  
 TCGAAAACGAGCTCGAATTCttattacgatcctcgcgccccctaccaccgtaactcgtcaattccaagggcatcggg  
 aacatctgctcaaactcgaagtcggccatatccagagcgcgctagggggcggagtcgtggggggtaaatcccggac  
 ccggggaatccccgctcccccaacatgtccagatcgaaatcgtctagcgcgctcggcatgcgccatcgccacgctcctcg  
 ccgctcaagtggagctcgtccccaggctgacatcggtcgggggggcccgtcgacagctctgcgcgctggtcccgcggg  
 gagaagggacagggcggagccgcagccccgcctcttcgggggctcgtcgtccgggagatcgagcagggccctcga  
 tggtagaccgtaattgttttctgtacgcgcgctgtacgcggaccactttcacatttaagttgttttctaat  
 ccgcatatgatcaattcaaggccgaataagaaggctggctctgcaccttggatcaataaattcgatagcttctg  
 taataatggcggcactactatcagtagtaggtgtttccctttctcttttagcgaacttgatgctcttgatcttccaata  
 cgcaacctaaagtataaatgccccacagcgtgagtgcatataatgcattctctagtgaaaaaccttggttggcataaa  
 aaggctaattgattttgcgagagtttcatactgtttttctgtaggcgtgtacctaaatgtaacttttgcctccatcgcg  
 atgacttagtaaaagcacatctaaaacttttagcgttattacgtaaaaaatcttggcagctttcccttctaaagggc  
 aaaagtgagtagtggctctaacatctcaatggcgaaggcgtcgagcaaagcccgttattttttacatgcca  
 tacaatgtaggctgctctacacctagcttctgggcgagtttacgggttggttaaaccttcgattccgacctcattaag  
 cagctctaattgcgctgtaatacactttacttttctaatctagacatatgaattaattcGggggccgaggaggctgg  
 atcgggtcccgggtgcttctatggagggtcaaaacagcgtggatggcgtctccaggcgatctgacggttcactaaacga  
 gctctgcttatatagacctcccaccgtacacgcctaccgcccatttgcgtcaatggggcggagttgttacgacattt  
 tggaaagtcctggtgattttgggtgccaacaaactcccattgacgtcaatgggggtggagacttggaaatcccgctg  
 agtcaaacgctatccacgcccattgatgtactgcaaaacccgcatcccatggtaatagcgaatgactaatacgtag  
 atgtactgccaagtaggaaagtcccataaggctcatgtactgggcataatgccaggcggggccatttacggctcattgac  
 gtcaatagggggcgtacttggcatatgatacacttgatgtactgccaagtgggcagtttagcgtaaatactccacc  
 attgacgtcaatggaaagtcctattggcgcttactatgggaacatacgtcattattgacgtcaatggggcgggggctcg  
 ttgggcggtcagccaggcggggccatttacggtaagttatgtaacgcggaactccatataatgggctatgaactaatga  
 cccgtaattgattactattaataactagtcaataatcaatgtcaacatggcggtaatgttggacatgagccaatat  
 aatgtacataattatgatatggatacaacgtatgcaatgggccaagctcctcgagtaattcgcgccacttctaaata  
 agcgaatttcttatgatttttattattaataaagttataaaaaaataagtgatatacaaaattttaaagtg  
 actcttaggtttttaaagcaaaattcttattcttgagtaactcttctctgtaggtcagggttgccttctcaggatag  
 tatgaggtcgtcttattgaccacacctctaccggcAGATCCGCTAGGGATAACAGGGTAATATagatcaattcctc  
 gatcgagtttaccact**ccctatcagtgatagagaaaagtgaaagtcgagtttaccactccctatcagtgatagagaa**  
**aagtgaaagtcgagtttaccactccctatcagtgatagagaaaagtgaaagtcgagtttaccactccctatcagtgat**  
**tagagaaaagtgaaagtcgag**ctcggtaccctatggcagtcagtgctctgtatgtatataaaactcttggtttctt  
 cttttctctaaatattcttcttatacattaggtcctttgtagcataaataactatacttctatagacacgcaaac  
 acaatacacacactaaattaccggatcaattcggg**ATG**

pNT18\_mCherry\_URA

Primer annealing sequences used for PCR are underlined. mCherry sequence used for C-terminal tagging is in bold font.

ATATCAGATCCACTAGTGGCCTATGCGGCCGCGGATCTGCCGGTCTCCCTATAGTGAGTCGTATTAATTTTCGATAAG  
 CCAGGTTAACCTGCATTAATGAATCGGCCAACCGCGGGGAGAGGCGGTTTTCGCTATTGGGCGCTCTTCCGCTTCCT  
 CGCTCACTGACTCGCTGCGCTCGGTTCGGTTCGGCTGCGGCGAGCGGTATCAGCTCACTCAAAGGCGGTAATACGGTTA  
 TCCACAGAATCAGGGGATAACGCAGGAAAGAACATGTGAGCAAAAAGGCCAGCAAAAAGGCCAGGAACCGTAAAAAGGC  
 CGCGTTGCTGGCGTTTTTCCATAGGCTCCGCCCCCTGACGAGCATCACAAAAATCGACGCTCAAGTCAGAGGTGGC  
 GAAACCCGACAGGACTATAAAGATAACCAGGCGTTTTCCCCCTGGAAGCTCCCTCGTGCGCTCTCTGTTCCGACCCTG  
 CCGCTTACCGGATACCTGTCCGCTTTTCTCCCTTCGGGAAGCGTGGCGCTTTCTCAATGCTCACGCTGTAGGTATCT  
 CAGTTCCGGTGTAGGTTCGTTCCGCTCCAAGCTGGGCTGTGTGCACGAACCCCCCGTTTCAGCCCGACCGCTGCGCCTTAT  
 CCGGTAACCTATCGTCTTGAGTCCAACCCGGTAAGACACGACTTATCGCCACTGGCAGCAGCCACTGGTAACAGGATT  
 AGCAGAGCGAGGTATGTAGGCGGTGCTACAGAGTTCTTGAAGTGGTGGCCTAACTACGGCTACACTAGAAGGACAGT  
 ATTTGGTATCTGCGCTCTGCTGAAGCCAGTTACCTTCGGAAAAAGAGTTGGTAGCTCTTGATCCGGCAAACAAACCA  
 CCGCTGGTAGCGGTGGTTTTTTTTGTTTGAAGCAGCAGATTACGCGCAGAAAAAAGGATCTCAAGAAGATCCTTTG  
 ATCTTTTCTACGGGGTCTGACGCTCAGTGGAAACGAAAACCTCACGTTAAGGGATTTTGGTTCATGAGATTATCAAAAAG  
 GATCTTACCTAGATCCTTTTTAAATTAATAAATGAAGTTTTAAATCAATCTAAAGTATATATGAGTAAACTTGGTCTG  
 ACAGTTACCAATGCTTAATCAGTGAGGCACCTATCTCAGCGATCTGTCTATTTTCGTTTCATCCATAGTTGCCTGACTC  
 CCCGTCGTGTAGATAACTACGATACGGGAGGGCTTACCATCTGGCCCCAGTGTGCAATGATACCGCGAGACCCACG  
 CTCACCGGCTCCAGATTTATCAGCAATAAACCCAGCCAGCCGGAAGGGCCGAGCGCAGAAGTGGTCTGCAACTTTAT  
 CCGCCTCCATCCAGTCTATTAATTGTTGCCGGGAAGCTAGAGTAAGTAGTTCGCCAGTTAATAGTTTGGCACAACGTT  
 GTTGGCATTGCTACAGGCATCGTGGTGTACGCTCGTTCGTTTGGTAGTGGCTTCACTTCCAGTCCGGTTCCCAACGATC  
 AAGCGAGTTACATGATCCCCATGTTGTGCAAAAAAGCGGTTAGCTCCTTCGGTCTCCGATCGTTGTGAGAGTA  
 AGTTGGCCGAGTGTATCACTCATGGTTATGGCAGCACTGCATAATTCTTACTGTTCATGCCATCCGTAAGATGC  
 TTTTCTGTGACTGGTGAGTACTCAACCAAGTCATTCTGAGAATAGTGTATGCGGCGACCGAGTTGCTCTTGGCCGGC  
 GTCAATACGGGATAATACCGCGCCACATAGCAGAACTTTAAAAGTGCTCATCATTGGAAAACGTTCTTTCGGGGCGAA  
 AACTCTCAAGGATCTTACCGCTGTTGAGATCCAGTTCGATGTAACCCACTCGTGCACCCAACTGATCTTACGATCT  
 TTTACTTTTACCAGCGTTTTCTGGGTGAGCAAAAACAGGAAGGCAAAAATGCCGCAAAAAAGGGAATAAGGGCGACACG  
 GAAATGTTGAATACTCATACTCTTCTTTTTCAATATTATTGAAGCATTATCAGGGTTATTGTCTCATGAGCGGAT  
 ACATATTTGAATGTATTTAGAAAAATAAACAAATAGGGGTTCCGCGCACATTTCCCCGAAAAGTGCCACCTGACGTC  
 TAAGAAACCATTATTATCATGACATTAACCTATAAAAATAGGCGTATCACGAGGCCCTTTCGCTCTCGCGCGTTTTCGG  
 TGATGACGGTGAAAACCTCTGACACATGCAGCTCCCGGAGACGGTACAGCTTGTCTGTAAGCGGATGCCGGGAGCA  
 GACAAGCCCGTCAGGGCGCGTACGCGGGTGTGGCGGGTGTGCGGGCTGGCTTAACTATGCGGCATCAGAGCAGATT  
 GTACTGAGAGTGCACCATATGGACATATTGTGCTTAGAACGCGGGCTACAATTAATACATAACCTTATGTATCATACA  
 CATACGATTTAGGTGACACTATAGAACGCGGCCAGCTGAAGCTTCGTACGCTGCAGGTGCGACGGATCGGTGACG  
 GTGCTGGTTTTAATTAACATG**GTGAGCAAGGGCGAGGAGGATAACATGGCCATCATCAAGGAGTTCATGAGATTCAAG**  
**GTGCACATGGAGGGCTCCGTGAACGGCCACGAGTTCGAGATCGAGGGCGAGGGCGAGGGCAGACCCTACGAGGGCAC**  
**CCAGACCGCAAGCTGAAGGTGACCAAGGGTGGCCCCCTGCCCTTCGCCTGGGACATCCTGTCCCCTCAGTTCATGT**  
**ACGGCTCCAAGGCCTACGTGAAGCACCCCGCGACATCCCCGACTACTTGAAGCTGTCTTCCCCGAGGGCTTCAAG**  
**TGGGAGAGAGTGAAGTTCGAGGACGGCGCGTGGTACCGTACCCAGGACTCCTCCCTGCAGGACGGCGAGTT**  
**CATCTACAAGGTGAAGTTGAGAGGCACCAACTTCCCCTCCGACGGCCCCGTAATGCAGAAGAAGACCATGGGCTGGG**  
**AGGCCTCCTCCGAGAGAATGTACCCCGAGGACGGCGCCCTGAAGGGCGAGATCAAGCAGAGGCTGAAGCTGAAGGAC**  
**GGCGGCCACTACGACGCTGAGGTCAAGACCACCTACAAGGCCAAGAAGCCCGTGCAGCTGCCCGGCGCCTACAACGT**  
**CAACATCAAGTTGGACATCACCTCCCACAACGAGGACTACACCATTGTGGAACAATATGAAAAGAGCTGAAGGTAGAC**  
**ATTCTACTGGTGGTATGGATGAATTGTACAAA**TAA**GGCGCGCCACTTCTAAATAAGCGAATTTCTTATGATTTATGA**  
 TTTTTATTATTAATAAGTTATAAAAAAATAAGTGATAACAAATTTTAAAGTGACTCTTAGGTTTTTAAACGAAAA  
 TTCTTATTCTTGAGTAACTCTTTCCTGTAGGTTCAGGTTGCTTTCTCAGGTATAGTATGAGGTGCTCTTATTGACCA  
 CACCTTACCAGGACATCCGCTAGGGATAACAGGGTAATATAGATCTGTTTAGCTTGCCTCGTCCCCGCGGGTTCAC  
 CCGGCCAGCGACATGGAGGCCAGAAATACCCTCCTTGACAGTCTTGACGTGCGCAGCTCAGGGGCATGATGTGACTG  
 TCGCCCCGTACATTTAGCCCATACATCCCCATGTATAATCATTTGCATCCATACATTTTGTGAGGCGCACGGCGCGAA  
 GCAAAAATTACGGCTCCTCGCTGCAGACCTGCGAGCAGGGAAACGCTCCCCTCACAGACGCGTTGAATTGTCCCCAC  
 GCCGCGCCCCCTGTAGAGAAATATAAAAAGGTTAGGATTTGCCACTGAGGTTCTTCTTTCATATACTTCTTTTTAAAT  
 CTTGCTAGGATACAGTTCTCACATCACATCCGAACATAAACAACCATGACAGTCAACACTAAGACCTATAGTGAGAG  
 AGCAGAAACTCATGCCTCACCAGTAGCACAGCGATTATTTTCGATTAATGGAAGTGAAGAAAACCAATTTATGTGCAT  
 CAATTGACGTTGATACCACTAAGGAATTCCTTGAATTAATTGATAAATTAGGTCCTTATGTATGCTTAATCAAGACT  
 CATATTGATATAATCAATGATTTTTCTTATGAATCCACTATTGAACCATTATTAGAATTTTACGTAACATCAATT

TATGATTTTTGAAGATAGAAAATTTGCTGATATTGGTAATACCGTAAAGAAACAATATATTGGTGGAGTTTATAAAA  
TTAGTAGTTGGGCAGATATTACCAATGCTCATGGTGTCACTGGGAATGGAGTGGTTGAAGGATTAACAGGGAGCT  
AAAGAAACCACCACCAACCAAGAGCCAAGAGGGTTATTGATGTTAGCTGAATTATCATCAGTGGGATCATTAGCATA  
TGGAGAATATTCTCAAAAAACTGTTGAAATTGCTAAATCCGATAAGGAATTTGTTATTGGATTTATTGCCAACGTG  
ATATGGGTGGCCAAGAAGAAGGATTTGATTGGCTTATTATGACACCTGGAGTTGGATTAGATGATAAAGGTGATGGA  
TTAGGACAACAATATAGAACTGTTGATGAAGTTGTTAGCACTGGAAGTATGATATTATCATTGTTGGTAGAGGATTGTT  
TGGTAAAGGAAGAGATCCAGATATTGAAGGTAAAAGGTATAGAAATGCTGGTTGGAATGCTTATTTGAAAAAGACTG  
GCCAATTATAATCAGTACTGACAATAAAAAGATTCTTGTTCCTCAAGAACTTGTCAATTTGTATAGTTTTTTTTATATTG  
TAGTTGTTCTATTTTAATCAAATGTTAGCGTGATTTATATTTTTTTTTTCGCCTCGACATCATCTGCCCAGATGCGAAG  
TTAAGTGCGCAGAAAGTAATATCATGCGTCAATCGTATGTGAATGCTGGTCGCTATACTGCTGTTCGATTTCGATACTA  
ACGCCGCCATCCAGTGTCGAAAACGAGCTCGAATTCATCGATG

## Supplementary Notes

### References for Supplementary Information

1. Kearns, B. G. et al. Essential role for diacylglycerol in protein transport from the yeast Golgi complex. *Nature* 387, 101-5 (1997).
2. Gari, E., Piedrafita, L., Aldea, M. & Herrero, E. A set of vectors with a tetracycline-regulatable promoter system for modulated gene expression in *Saccharomyces cerevisiae*. *Yeast* 13, 837-48 (1997).
3. Shaner, N. C. et al. Improved monomeric red, orange and yellow fluorescent proteins derived from *Discosoma* sp. red fluorescent protein. *Nat Biotechnol* 22, 1567-72 (2004).

| Protein ID | <b>IP 3xFlag-Orm1</b> |                     | <b>IP 3xFlag-Orm2</b> |                     |
|------------|-----------------------|---------------------|-----------------------|---------------------|
|            | # of peptides         | % Sequence Coverage | # of peptides         | % Sequence Coverage |
| Sac1       | 42                    | 74.6                | 33                    | 62.1                |
| Lcb1       | 23                    | 40.9                | 26                    | 43.5                |
| Lcb2       | 23                    | 41.0                | 22                    | 37.1                |
| Orm1       | 10                    | 49.1                | 4                     | 19.4                |
| Orm2       | 6                     | 25.0                | 8                     | 31.9                |
| Tsc3       | 3                     | 30.0                | 1                     | 17.5                |

**Supplementary Table 1. Orm-associated proteins identified by mass spectrometry.** Proteins found in immunoprecipitations of 3xFlag-Orm1 and 3xFlag-Orm2 were analyzed by mass spectrometry. Peptide coverage information for identified proteins corresponding to the bands indicated in **Fig. 2a** are shown above.

## Supplementary Notes

### References for Supplementary Information

1. Kearns, B. G. et al. Essential role for diacylglycerol in protein transport from the yeast Golgi complex. *Nature* 387, 101-5 (1997).
2. Gari, E., Piedrafita, L., Aldea, M. & Herrero, E. A set of vectors with a tetracycline-regulatable promoter system for modulated gene expression in *Saccharomyces cerevisiae*. *Yeast* 13, 837-48 (1997).
3. Shaner, N. C. et al. Improved monomeric red, orange and yellow fluorescent proteins derived from *Discosoma* sp. red fluorescent protein. *Nat Biotechnol* 22, 1567-72 (2004).
